# Supplementary material for: Liquid polybutadiene reinforced inverse vulcanised polymers
Source: Royal Society of Chemistry journal article supplement (doi:10.1039/d3ta05470e), 2023-12-12
Supplement: d3ta05470e1.pdf [file d3ta05470e1.pdf]

## Supporting Information

# Liquid polybutadiene reinforced inverse vulcanised polymers

Veronica Hanna<sup>\*a</sup>, Michael Graysmark<sup>b</sup>, Helen Willcock<sup>b</sup>, and Tom Hasell<sup>\*a</sup>

<sup>a</sup>Department of Chemistry, University of Liverpool, Crown Street, Liverpool, L69 7ZD, UK

<sup>b</sup>Department of Materials, Loughborough University, Epinal Way, Loughborough, LE11 3TU,  
UK

## Experimental

### Materials

Sulfur ( $S_8$ , 325 mesh,  $\geq 99.5\%$ , Brenntag UK & Ireland), 1,3-diisopropenylbenzene (DIB, Tokyo Chemical industry), dicyclopentadiene (DCPD, Tokyo Chemical industry), divinylbenzene (DVB, Sigma-Aldrich), liquid polybutadiene (cPBD, Sigma-Aldrich), grade B-1000 liquid polybutadiene (vPBD) was provided by Nisso, and grade LBR-302 liquid polybutadiene (KcPBD) was provided by Kuraray. All chemicals were used without further purification.

### Characterisation

**3-point bending tests** were carried out using the Shimadzu EZ Test at a crosshead speed of 1 mm/min at 25 °C, with a span of 60 mm between the supports. Specimens were 15 mm wide, 4 mm thick and 100 mm long and were tested according to ISO 178.

**Charpy impact tests** were carried out using Zwick Roell HIT5P with a 1J hammer. The unnotched specimens were 10 mm wide, 4 mm thick and 80 mm long and were tested according to ISO 179-2.

**Vickers hardness tests** were carried out using Mitutoyo hardness testing system at room temperature with a 2 kg load (HV2) on specimens that were 10 mm wide, 5 mm thick and 55 mm long and were tested according to ISO 6507. Specimens were polished using sandpaper grits of P280, P400, P800, and P1200 to provide a smooth surface for the tests.

**Differential scanning calorimetry (DSC)** thermograms were obtained using TA DSC25, where heat-cool-heat cycles were carried out with temperature ranges of -50 – 150 °C for sulfur polymers, and -90 - 50 °C for LPBD under nitrogen. The heating rate was 10 °C/min and the cooling rate was 10 °C/min.

**Fourier Transform Infrared Spectroscopy (FTIR)** was performed with a Bruker Vertex V70 FTIR spectrometer, with a diamond ATR crystal. Polymers were analysed as sheets with a thickness of 0.1 - 0.5 mm, made using a hot press at 160 °C, 5 MPa for ~5 min.

**Thermogravimetric analysis (TGA)** was carried out using TA Instruments Discovery TGA550 with wire wound (Pt/Rh) furnace at a ramp rate of 10 °C/min to 600 °C, and for LPBD to 1000 °C under nitrogen purge gas.

**Nuclear magnetic resonance (NMR)** was carried out using Bruker Ultrashield 400MHz with samples at a concentration of 37 g/L. Chemical shifts were referenced to residual  $CHCl_3$  ( $\delta 7.26$  ppm) in  $CDCl_3$ .

**Size exclusion chromatography (SEC)** was conducted using a Malvern Viscotek TDA 302 instrument equipped with a triple detector array TDA 305. SEC was performed at 35 °C at a flow rate of 1 mL min<sup>-1</sup> using THF as the mobile phase. Samples were analysed using a conventional calibration based upon linear poly(styrene) standards of  $M_p$  1200, 2430, 5640, 12630 and 29100.

**Scanning electron microscopy (SEM)** imaging of the polymer morphology was achieved using a Hitachi S-4800 cold Field Emission Scanning Electron Microscope (FE-SEM) operating in both scanning and transmission modes. The dry samples were prepared by adhering the polymer monoliths to a SEM stub with silver paint. Samples were coated with a 5-10 nm thick layer of chromium by a Quorum sputter coater using a current of 120 mA. Imaging was conducted at a working distance of ~6 mm at 5 kV. Images were taken using a combination of both upper and lower detector signals.

### Synthesis of S-DIB

Sulfur (5 g, 0.16 mol) and DIB (5 g, 0.031 mol) were added to a 40 mL reaction vial and heated at 160 °C in a heating block on a hot plate while stirring at 900 rpm. The mixture changed from yellow to a dark red viscous mixture after 30 min and was poured out into a silicone mould. The polymer was placed into the oven to cure at 140 °C for ~20 h. A black brittle polymer was produced.

### Synthesis of S-DVB

Sulfur (5 g, 0.16 mol) and DVB (5 g, 0.038 mol) were added to a 40 mL reaction vial and heated at 160 °C in a heating block on a hot plate while stirring at 900 rpm. The mixture changed from yellow to a dark orange viscous mixture after 10 min and was poured out into a silicone mould. The polymer was placed into the oven to cure at 140 °C for ~20 h. A black brittle polymer was produced.

#### Synthesis of S-DCPD

Sulfur (40 g, 1.28 mol) and DCPD (40 g, 0.304 mol) were added to a 250 mL round bottom flask and heated at 160 °C in a heating block on a hot plate while stirring at 900 rpm. The mixture changed from yellow to a black viscous mixture after 1 h 30 min and was poured out into a silicone mould. The polymer was placed into the oven to cure at 140 °C for ~20 h. A black brittle polymer was produced.

#### Synthesis of S-DIB-PBD

Sulfur (5 g, 0.16 mol) and L-PBD were added to a 40 mL reaction vial and heated at 160 °C in heating block on a hot plate with stirring at 900 rpm. The mixture changed from a yellow to a viscous opaque ochre mixture after 15 min. DIB was added to the mixture and after 10 – 15 min, the viscosity increased and the colour changed to dark brown then it was poured out into a silicone mould. The polymer was placed into the oven to cure at 140 °C for ~20 h. A black opaque polymer was produced.

#### Mechanical test sample preparation

All S-DIB-PBD samples were hot pressed in metal moulds at 160 °C for approximately 20 - 30 min, S-DIB was hot pressed at 120 °C for 10-20 min, S-DVB was hot pressed at 160 °C for 10-20 min, and S-DCPD was used straight from the silicone mould after curing as the stress of the temperature change after hot pressing caused it to crack.

**Table S1** Sample compositions.

| Sample abbreviation | Sulfur content (wt.%) | Crosslinker              | Crosslinker content (wt.%) | LPBD                         | LPBD MW (g/mol) | LPBD content (wt.%) |
|---------------------|-----------------------|--------------------------|----------------------------|------------------------------|-----------------|---------------------|
| cPBD                | N/A                   | N/A                      | N/A                        | <i>cis</i> -1,4 Sigma LPBD   | 15413           | 100                 |
| vPBD                | N/A                   | N/A                      | N/A                        | 1,2-vinyl Nisso LPBD         | 3620            | 100                 |
| KcPBD               | N/A                   | N/A                      | N/A                        | <i>cis</i> -1,4 Kuraray LPBD | 5690            | 100                 |
| S-cPBD              | 50                    | N/A                      | N/A                        | <i>cis</i> -1,4 Sigma LPBD   | 15413           | 50                  |
| S-DIB               | 50                    | 1,3-diisopropenylbenzene | 50                         | N/A                          | N/A             | N/A                 |
| S-DIB-10cPBD        | 50                    | 1,3-diisopropenylbenzene | 40                         | <i>cis</i> -1,4 Sigma LPBD   | 15413           | 10                  |
| S-DIB-20cPBD        | 50                    | 1,3-diisopropenylbenzene | 30                         | <i>cis</i> -1,4 Sigma LPBD   | 15413           | 20                  |
| S-DIB-30cPBD        | 50                    | 1,3-diisopropenylbenzene | 20                         | <i>cis</i> -1,4 Sigma LPBD   | 15413           | 30                  |
| S-DVB               | 50                    | divinylbenzene           | 50                         | N/A                          | N/A             | N/A                 |
| S-DCPD              | 50                    | dicyclopentadiene        | 50                         | N/A                          | N/A             | N/A                 |

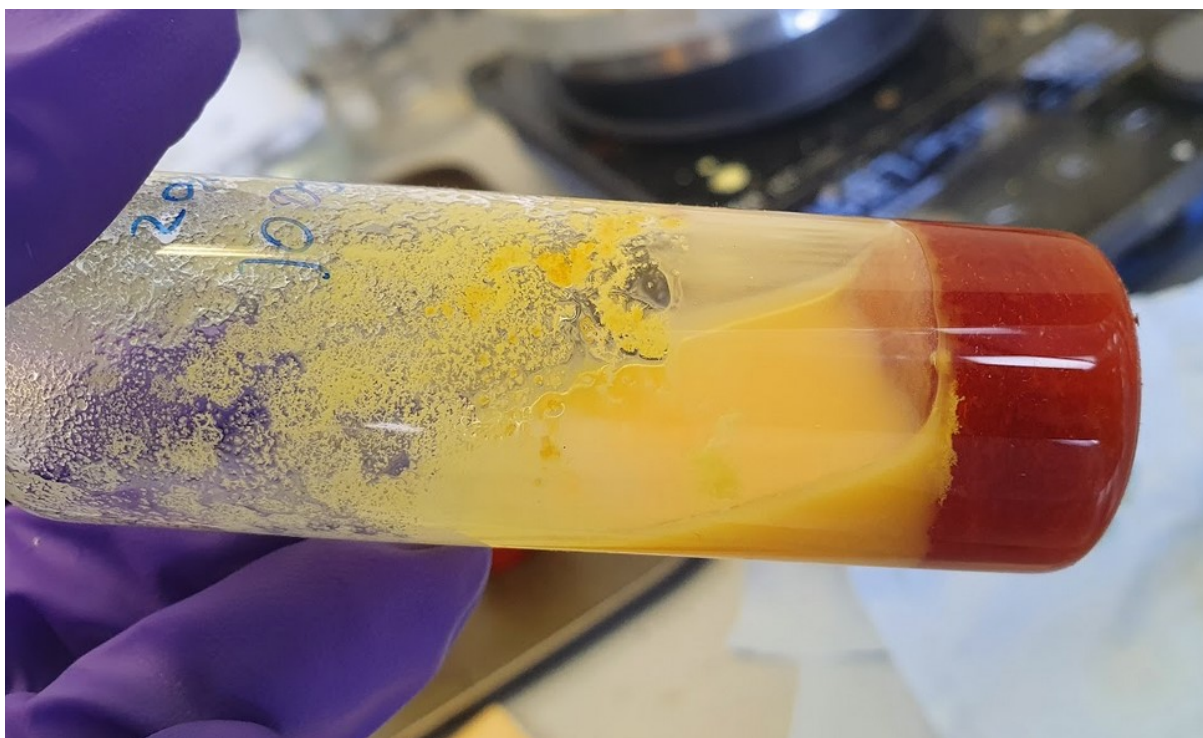

**Fig. S1** Photo of S-DIB-20vPBD separation after addition of DIB.

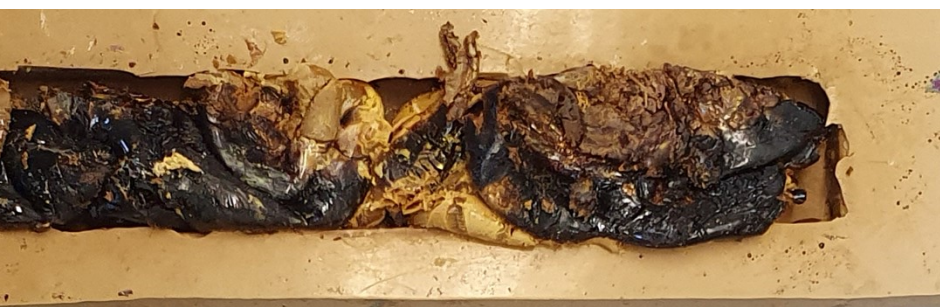

**Fig. S2** Photo of S-DIB-VPBD pre-polymer when Zn catalyst was used.

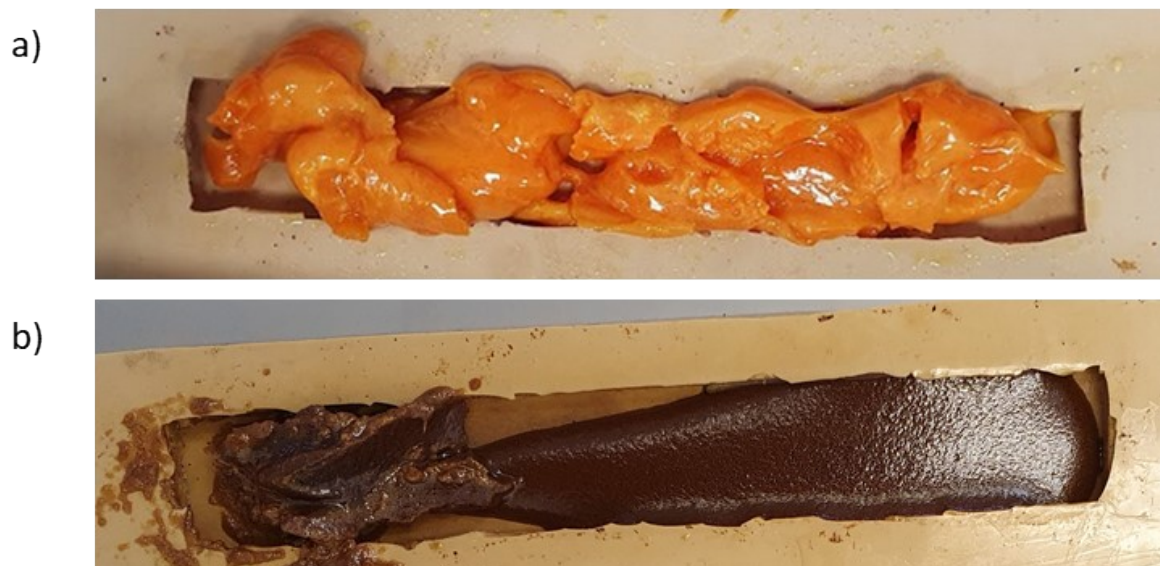

**Fig. S3** Photos of S-DIB-cPBD pre-polymer a) when DIB is reacted before cPBD; b) when cPBD is reacted before DIB.

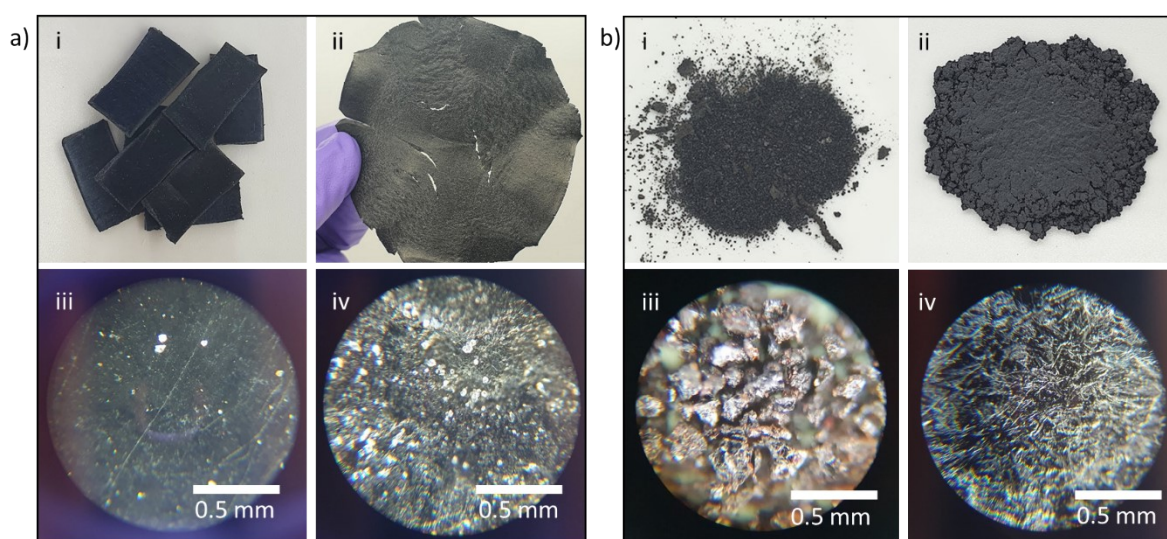

**Fig. S4** Photos of a) vulcanised rubber and b) S-DIB-30cPBD; i) before hot pressing, ii) after hot pressing at 160 °C. Optical microscope images taken using 10x magnification lens iii) before hot pressing, iv) after hot pressing at 160 °C to show the recyclability of S-DIB-30cPBD by comparing it to a non-recyclable material.

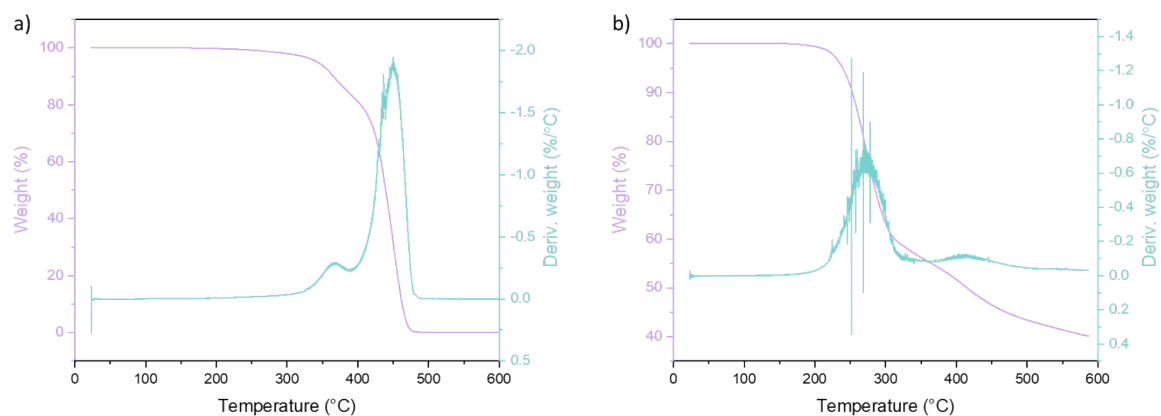

**Fig. S5** TGA curves of a) cPBD and b) S-cPBD to show the derivative weight to highlight the two-step degradation of cPBD that occurs.

**Table S2** DSC and TGA values of different sulfur polymer samples.

| Sample       | $T_g$ (°C) | Onset temperature (°C) | End temperature (°C) | Weight loss (%) |
|--------------|------------|------------------------|----------------------|-----------------|
| cPBD         | -          | 414                    | 467                  | 99.7            |
| S-cPBD       | -          | 321                    | 387                  | 97.8            |
| S-DIB        | 34         | 221                    | 278                  | 68.3            |
| S-DIB-10cPBD | 16         | 185                    | 275                  | 47.1            |
| S-DIB-20cPBD | 42         | 247                    | 306                  | 47.8            |
| S-DIB-30cPBD | 78         | 247                    | 306                  | 54.7            |

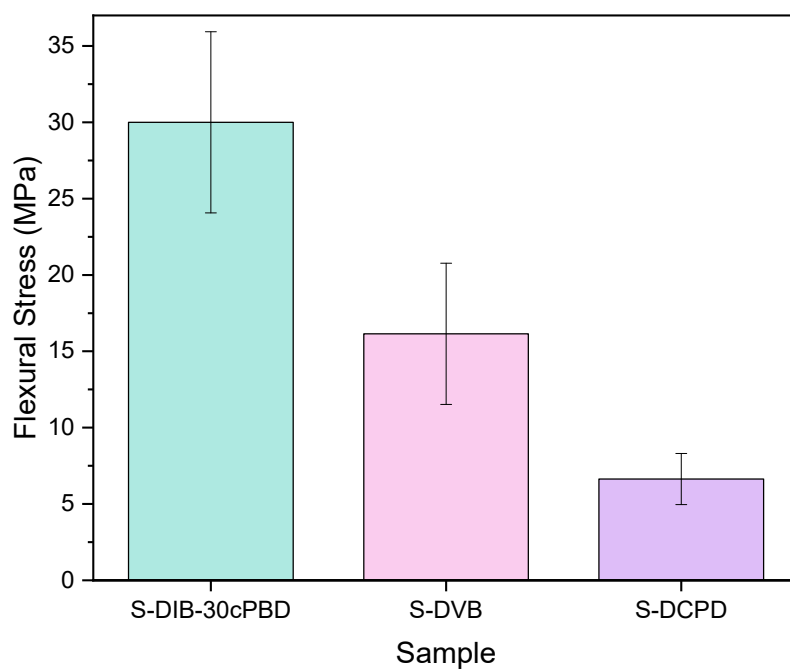

**Fig. S6** Bar chart of the flexural stress of S-DIB-30cPBD compared to other sulfur polymers.

**Table S3** 3-point bending test results of different sulfur polymers.

| Sample       | Flexural Stress (MPa) | Flexural Modulus (MPa) | Stroke (mm) |
|--------------|-----------------------|------------------------|-------------|
| S-DIB        | 3.93                  | 1377                   | 0.46        |
| S-DIB-10cPBD | 3.00                  | 355                    | 1.19        |
| S-DIB-20cPBD | 16.41                 | 2152                   | 1.09        |
| S-DIB-30cPBD | 30.00                 | 1584                   | 2.26        |
| S-DVB        | 16.14                 | 2402                   | 0.83        |
| S-DCPD       | 6.64                  | 2156                   | 0.56        |

**Table S4** Elemental analysis of sulfur polymers.

| Sample       | C (%) | H (%) | S (%) |
|--------------|-------|-------|-------|
| S-DIB        | 43.32 | 4.11  | 51.45 |
| S-DIB-10cPBD | 42.77 | 4.23  | 52.1  |
| S-DIB-20cPBD | 41.85 | 4.4   | 51.86 |
| S-DIB-30cPBD | 42.27 | 4.66  | 52.26 |



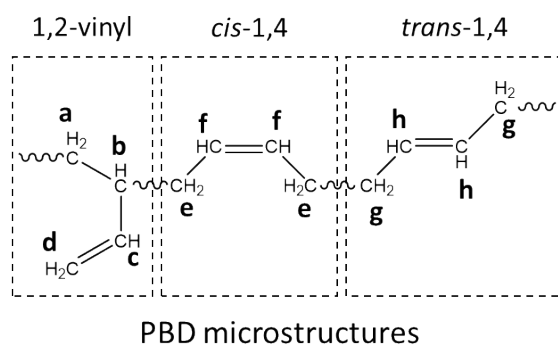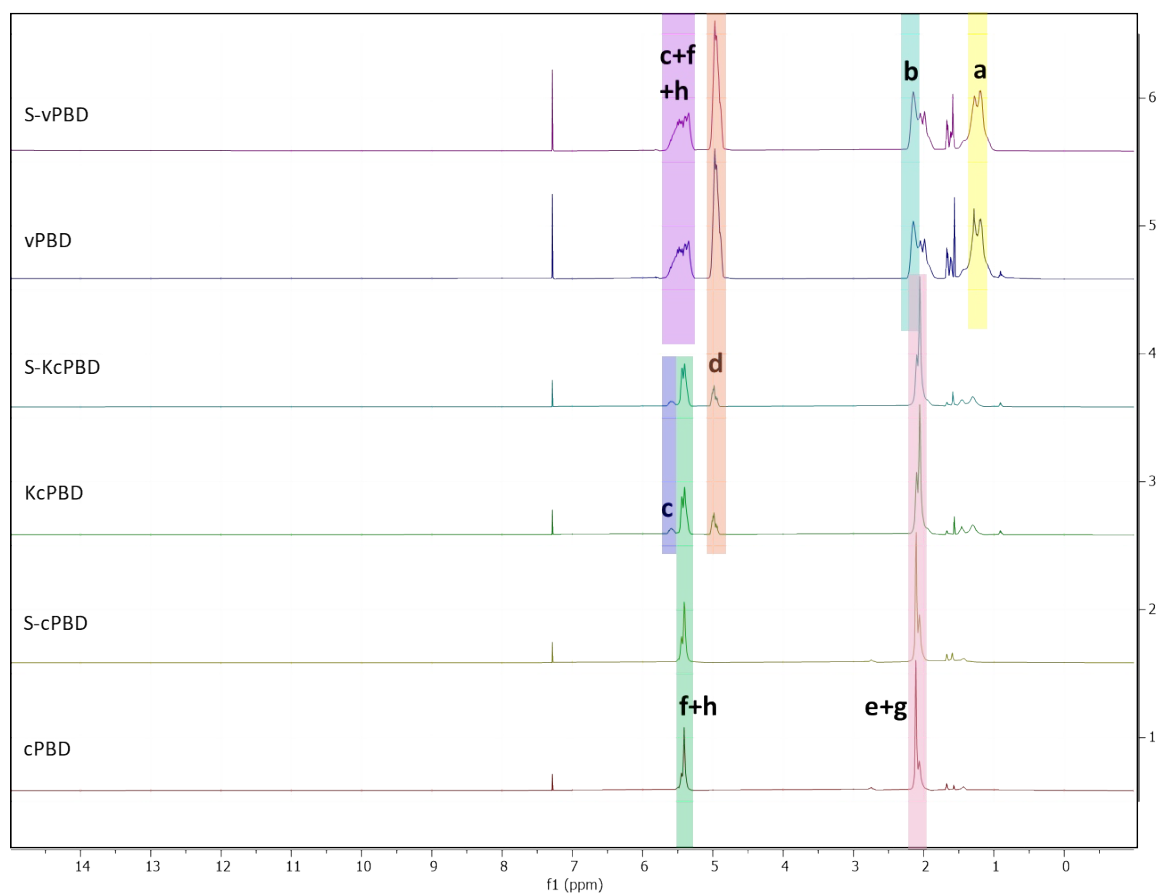

**Fig. S7** <sup>1</sup>H NMR spectra of each type of LPBD compared to their corresponding S-LPBD pre-polymer. No change in spectra between the LPBD and S-LPBD for each type of LPBD indicates that once reaction with sulfur occurs, a sufficient amount of crosslinking occurs that S-LPBD becomes insoluble and that we are likely observing the unreacted LPBD in the spectra of S-LPBD samples.

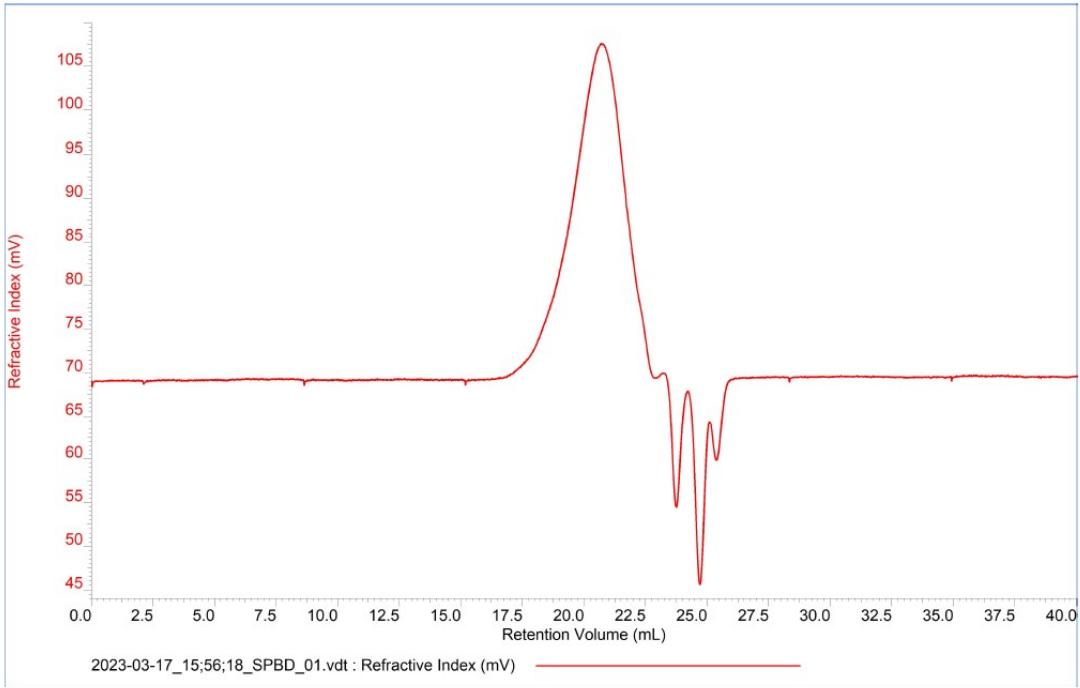

| Peak | Ret Time | Mn    | Mw     | Mp    | Mw/Mn | RI Area |
|------|----------|-------|--------|-------|-------|---------|
| 1    | 20.717   | 3,104 | 15,413 | 4,596 | 4.965 | 95.89   |

**Fig. S8** SEC of cPBD.

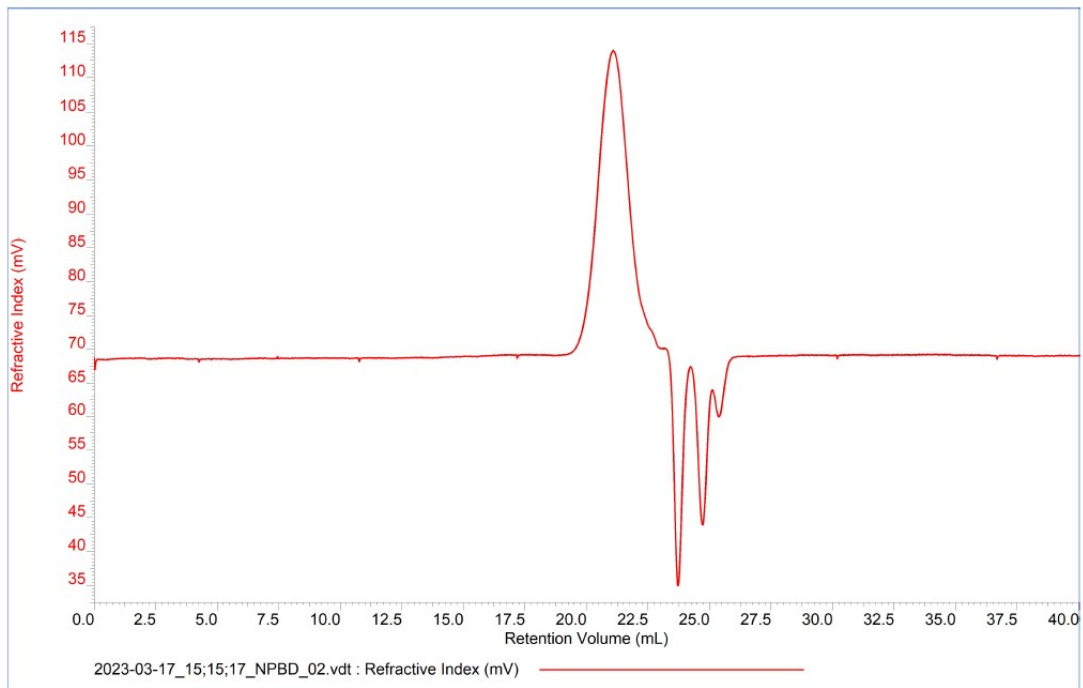

| Peak | Ret Time | Mn    | Mw    | Mp    | Mw/Mn | RI Area |
|------|----------|-------|-------|-------|-------|---------|
| 1    | 21.073   | 2,053 | 3,620 | 2,955 | 1.763 | 64.29   |

**Fig. S9** SEC of vPBD.

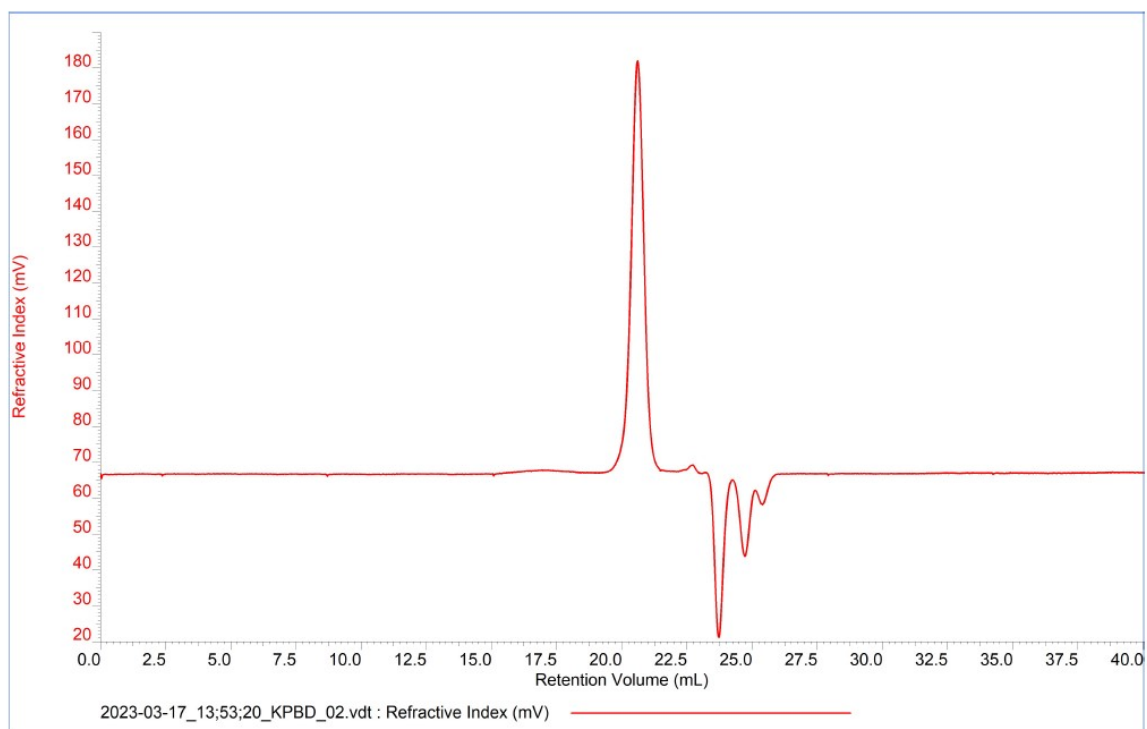

| Peak | Ret Time | Mn    | Mw    | Mp    | Mw/Mn | RI Area |
|------|----------|-------|-------|-------|-------|---------|
| 1    | 20.597   | 5,117 | 5,690 | 5,320 | 1.112 | 67.53   |

**Fig. S10** SEC of KcPBD.
